# Supplementary material
Source: ML conference proceedings conference paper supplement (https://openreview.net/forum?id=e1oe8F2tjV)

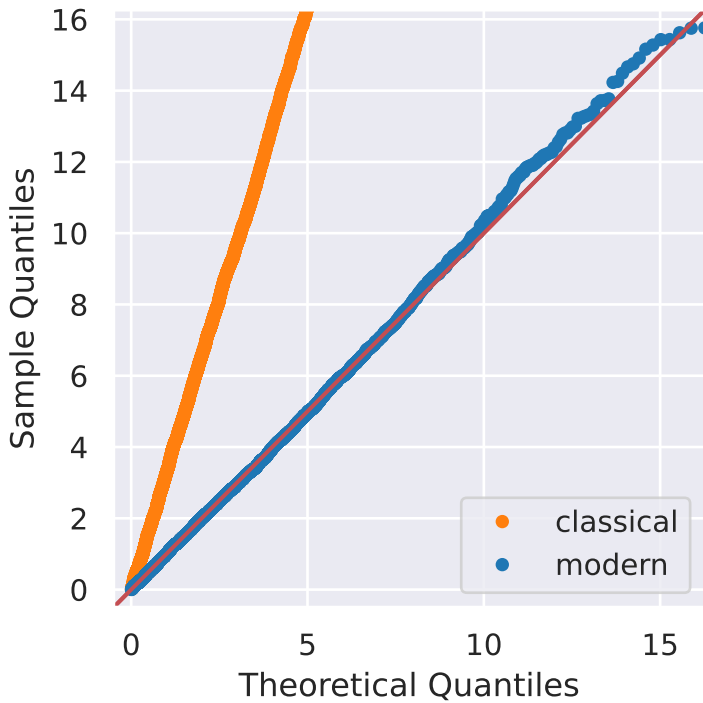

Supplement: supplementary_material [file attachment]

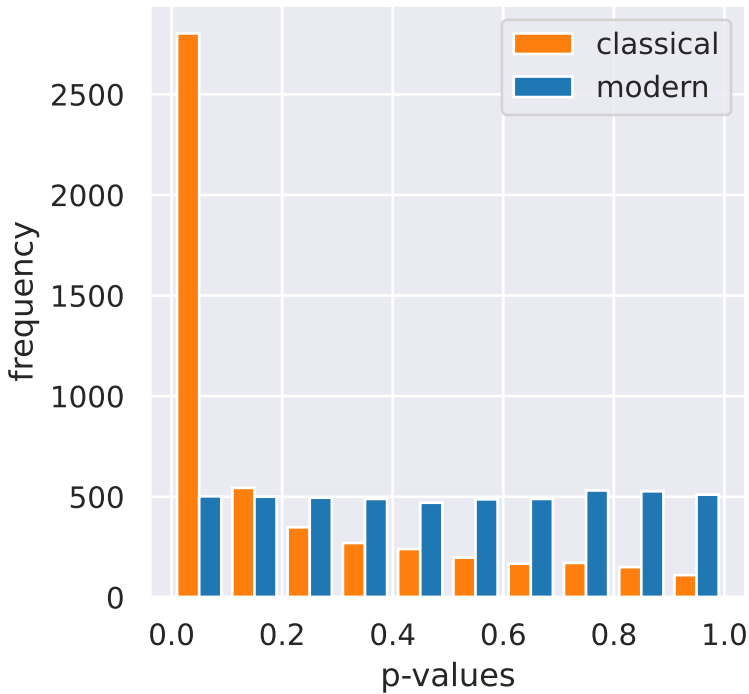

Supplement: supplementary_material [file attachment]

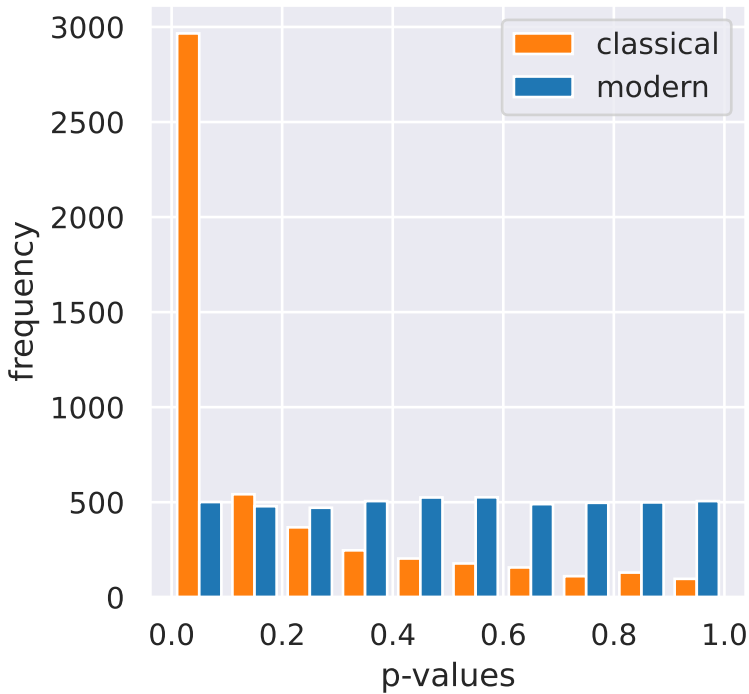

Supplement: supplementary_material [file attachment]

classical; coverage:28.8%

modern; coverage:95.1%

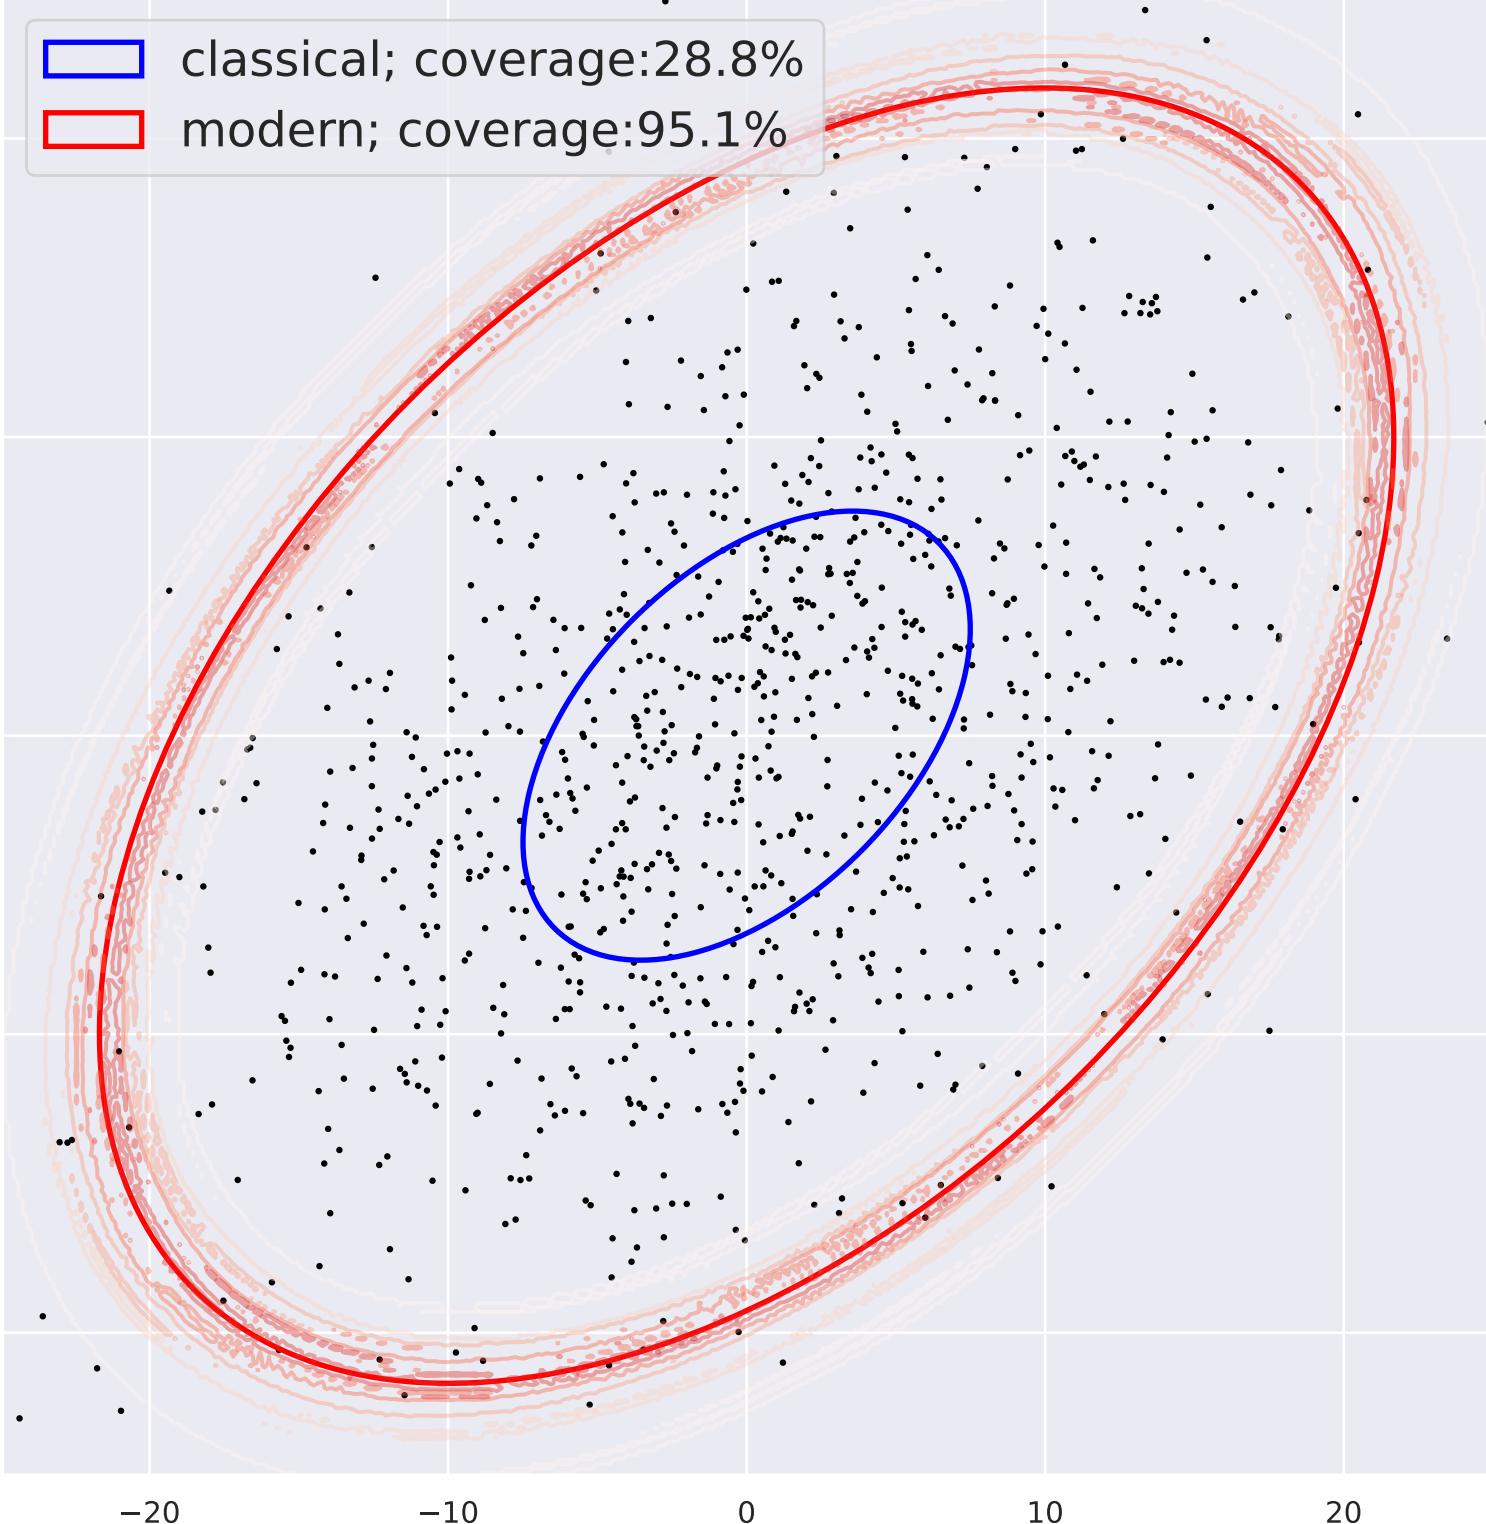

Supplement: supplementary_material [file attachment]

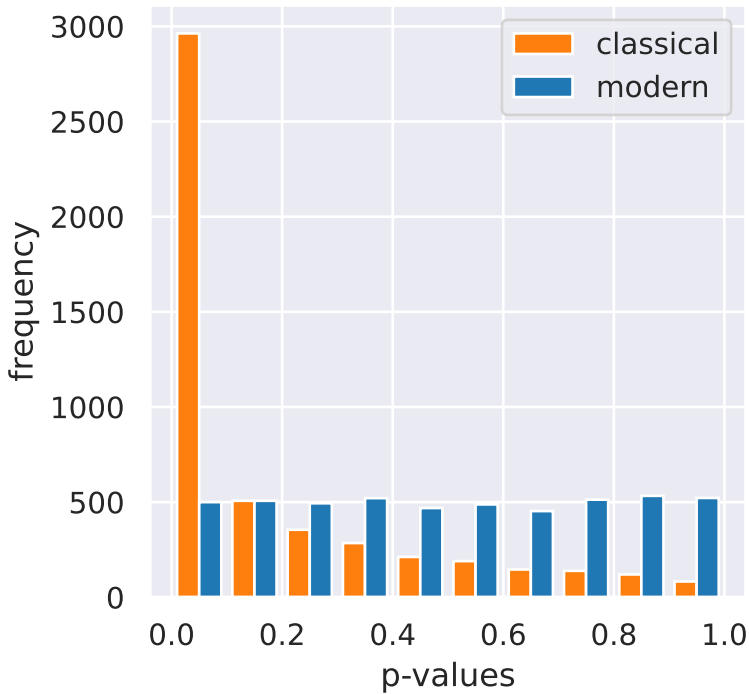

Supplement: supplementary_material [file attachment]

Sample Quantiles

17.5  
15.0  
12.5  
10.0  
7.5  
5.0  
2.5  
0.0

0

5

10

15

Theoretical Quantiles

classical  
modern

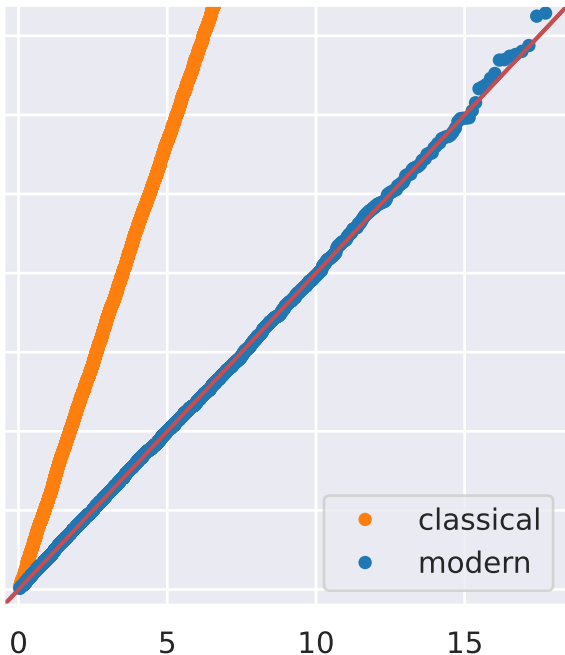

Supplement: supplementary_material [file attachment]

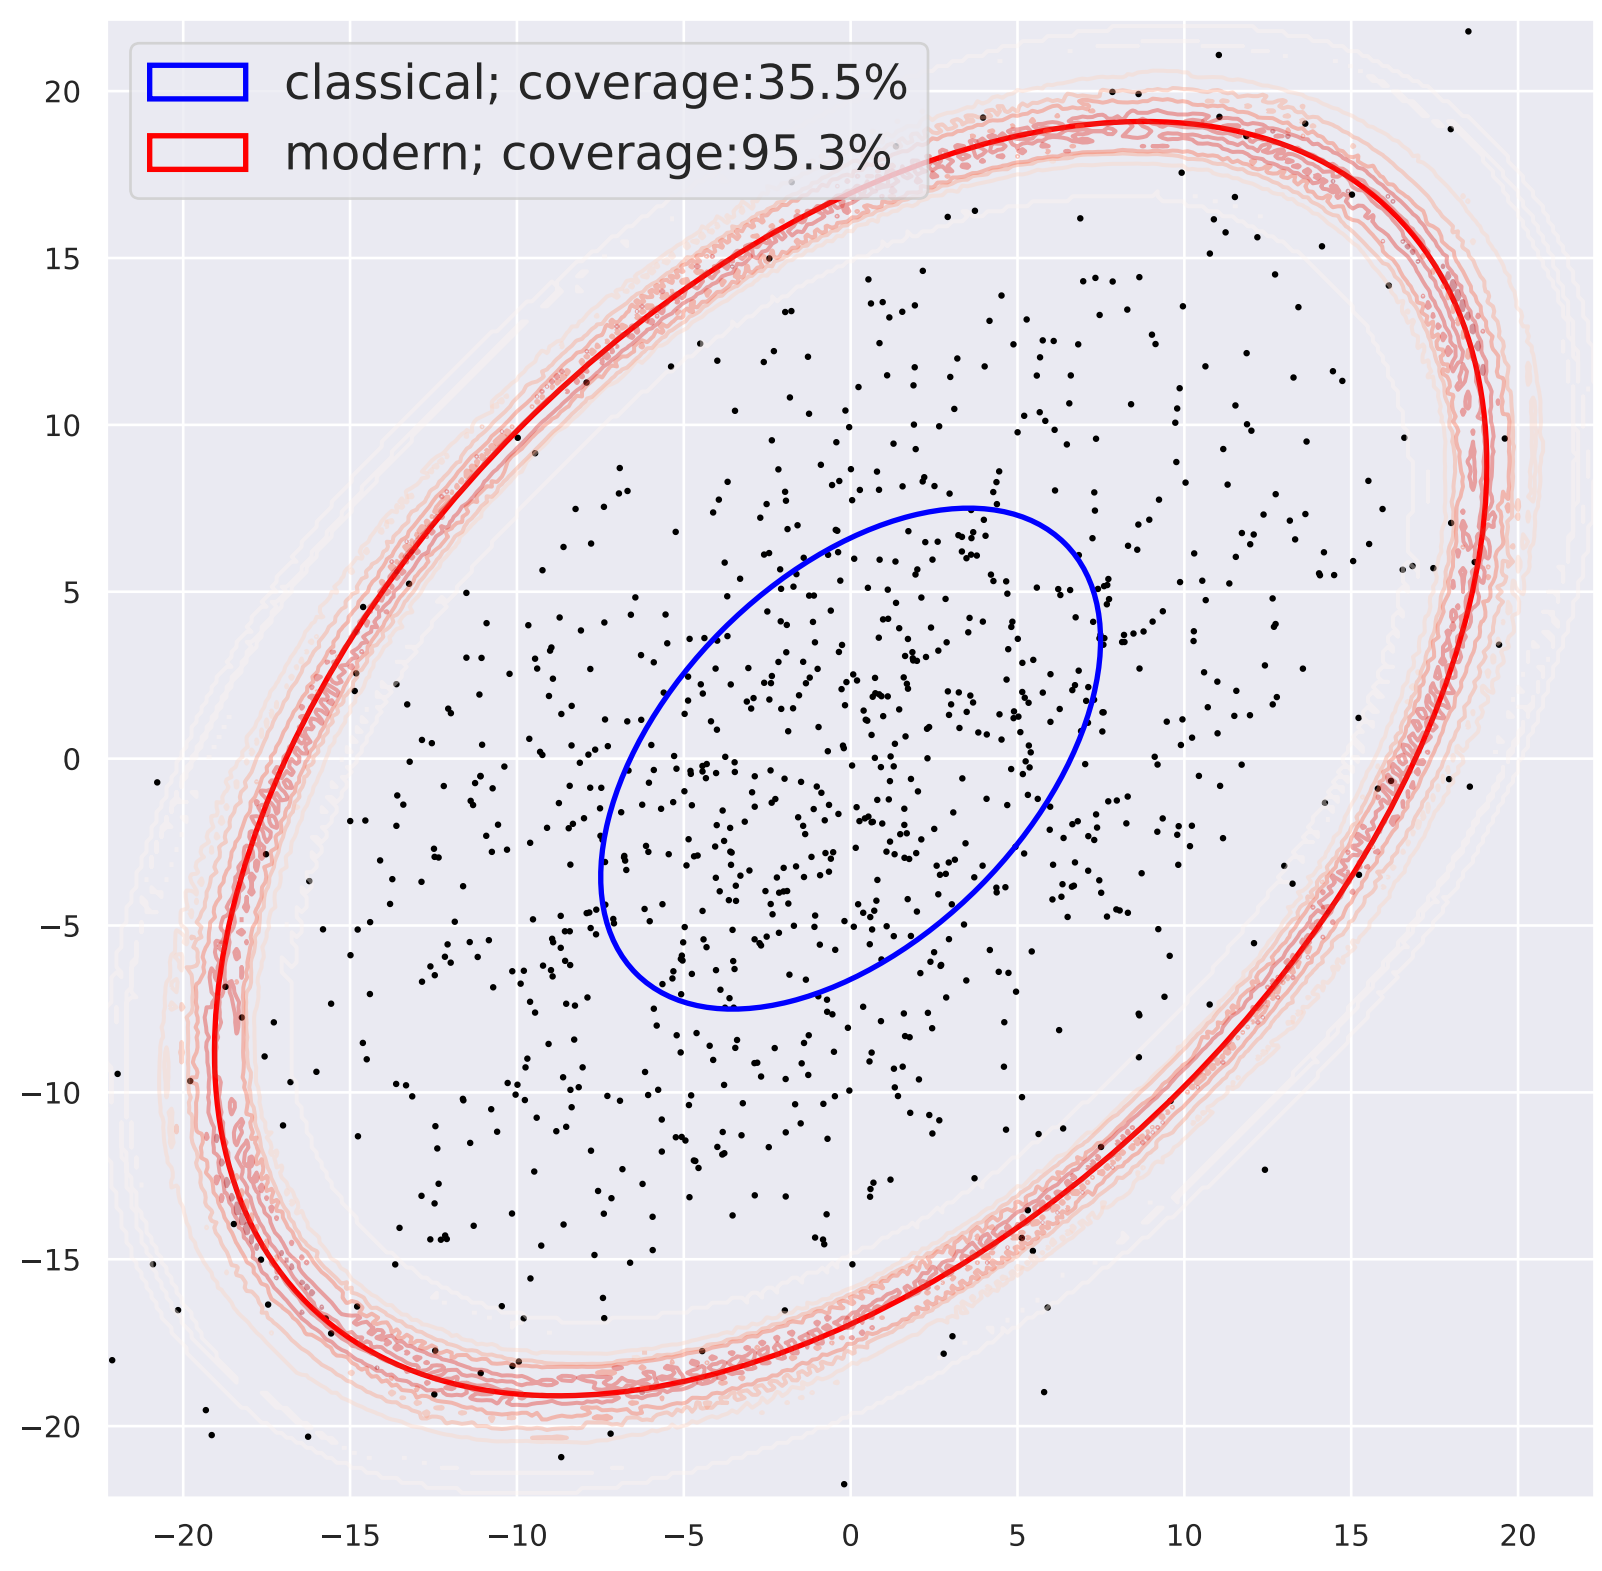

Supplement: supplementary_material [file attachment]

Sample Quantiles

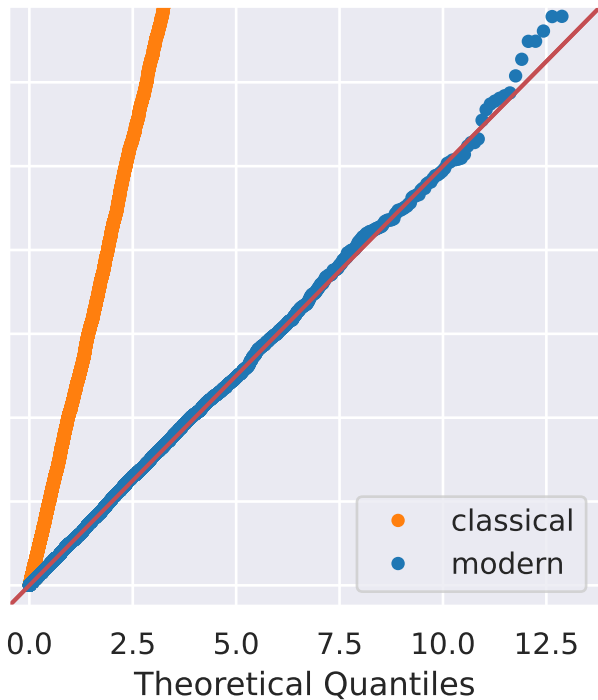

Supplement: supplementary_material [file attachment]

Sample Quantiles

17.5  
15.0  
12.5  
10.0  
7.5  
5.0  
2.5  
0.0

0

5

10

15

Theoretical Quantiles

classical  
modern

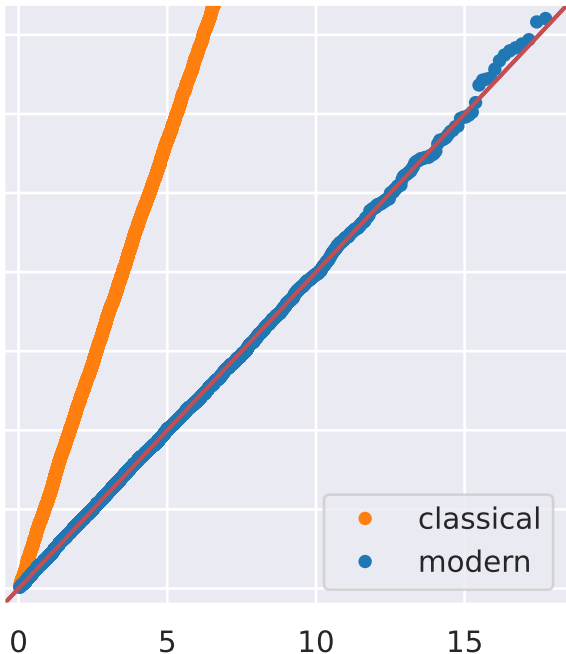

Supplement: supplementary_material [file attachment]

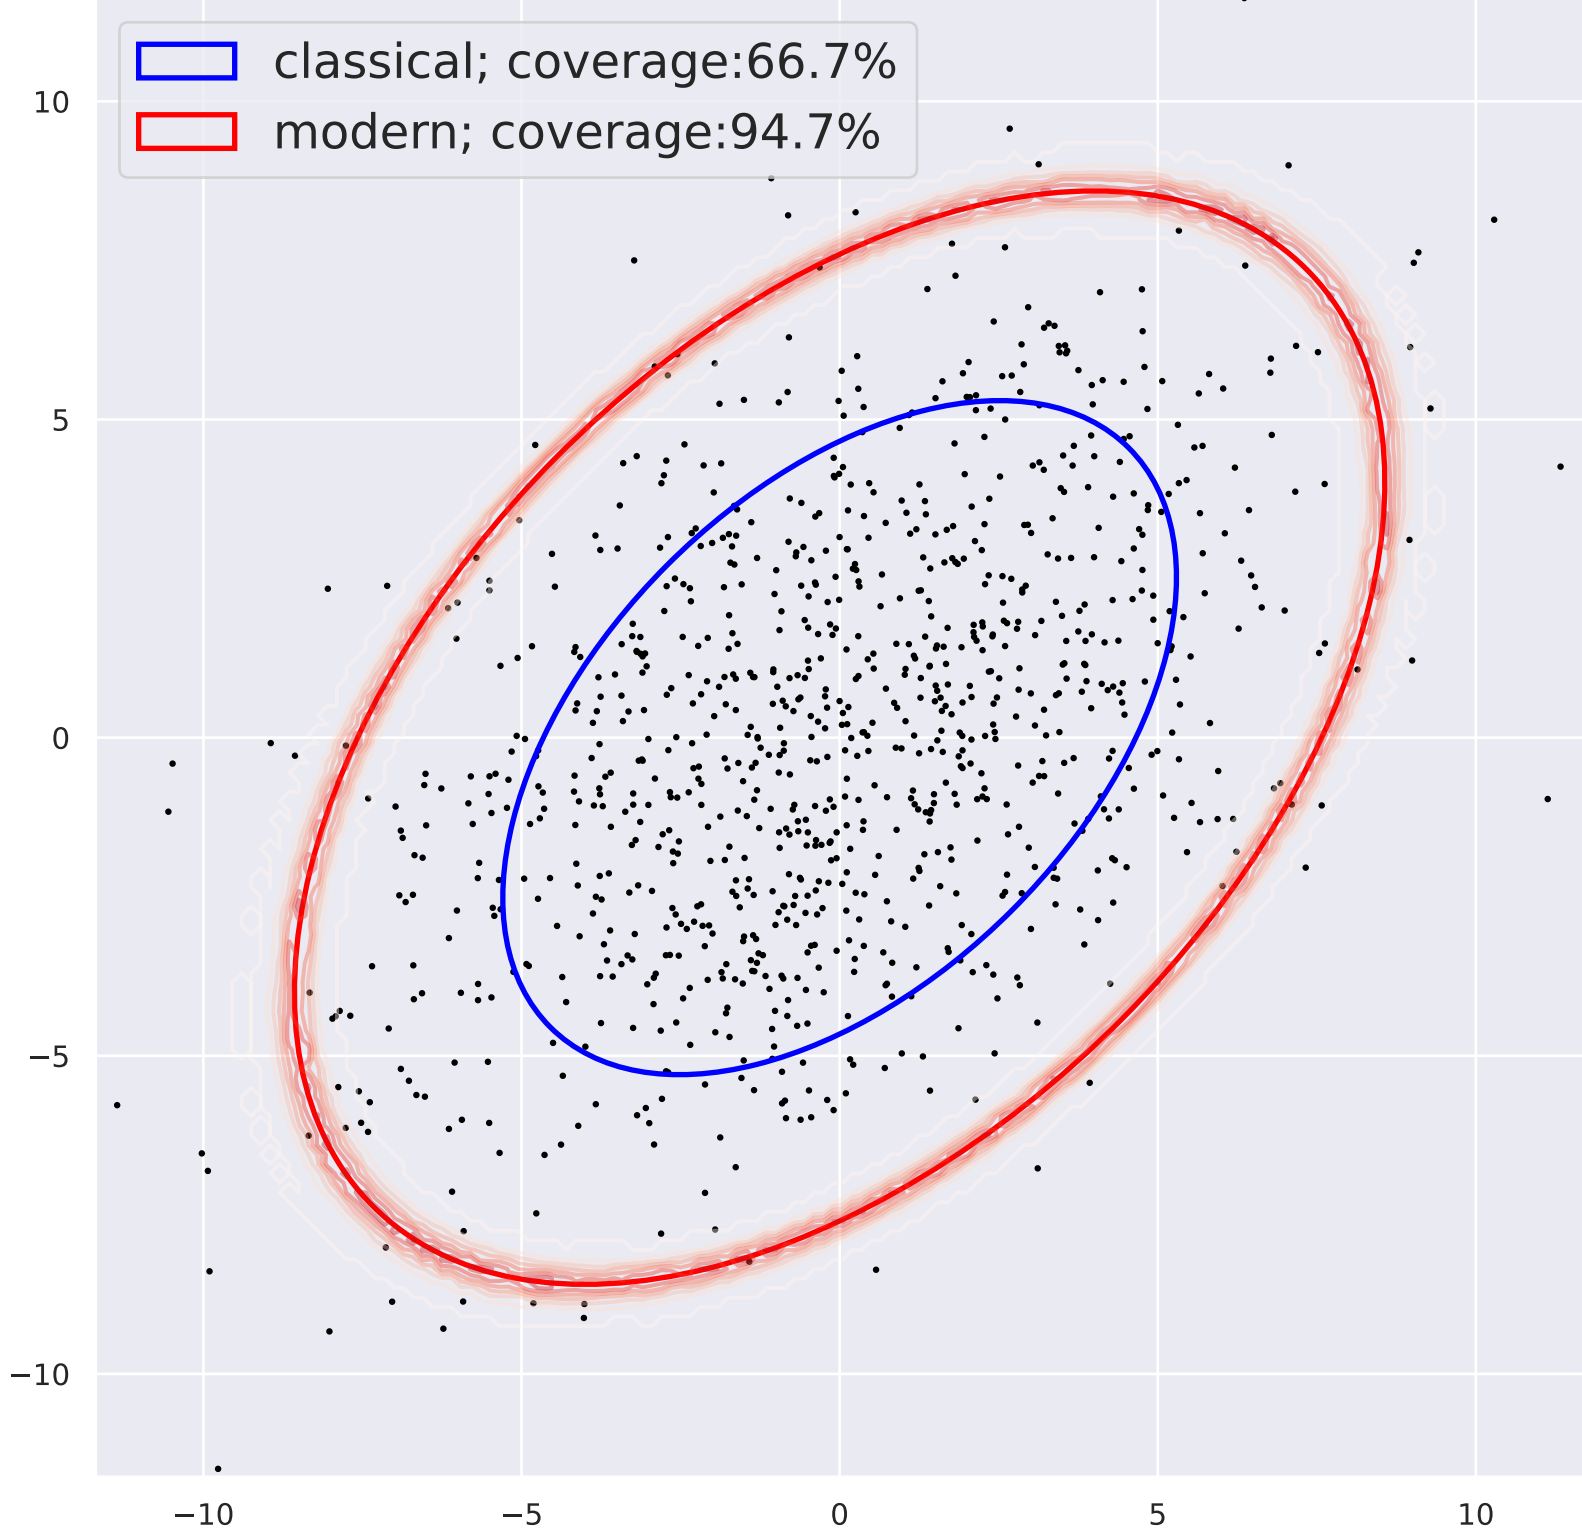

Supplement: supplementary_material [file attachment]

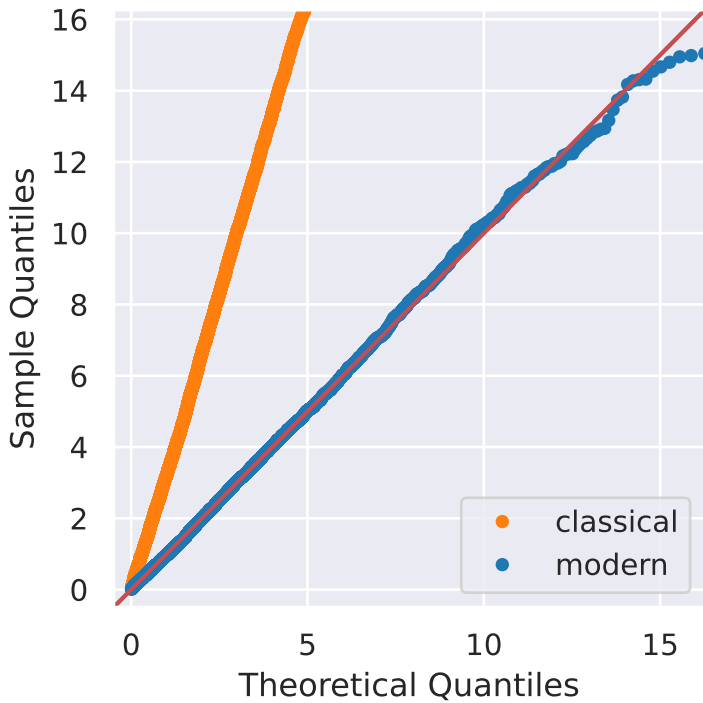

Supplement: supplementary_material [file attachment]

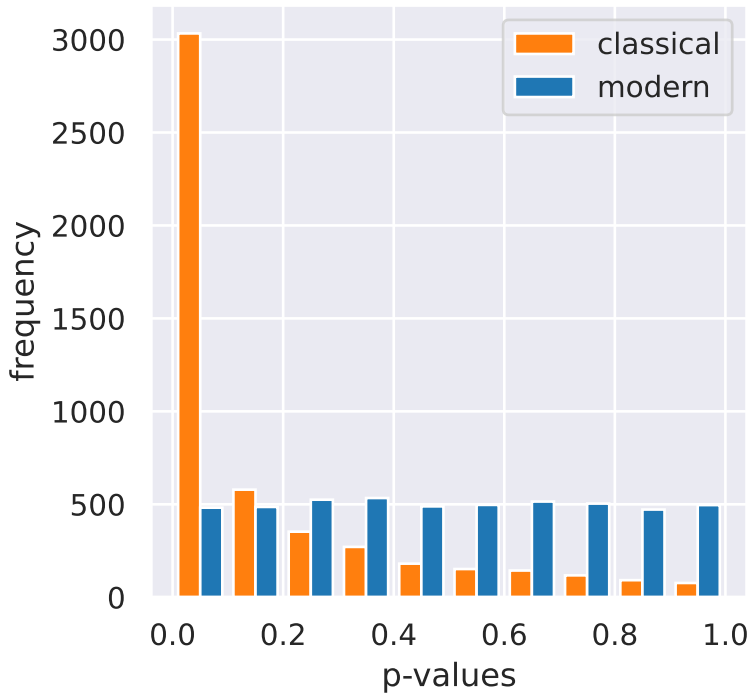

Supplement: supplementary_material [file attachment]

Sample Quantiles

17.5  
15.0  
12.5  
10.0  
7.5  
5.0  
2.5  
0.0

0

5

10

15

Theoretical Quantiles

classical  
modern

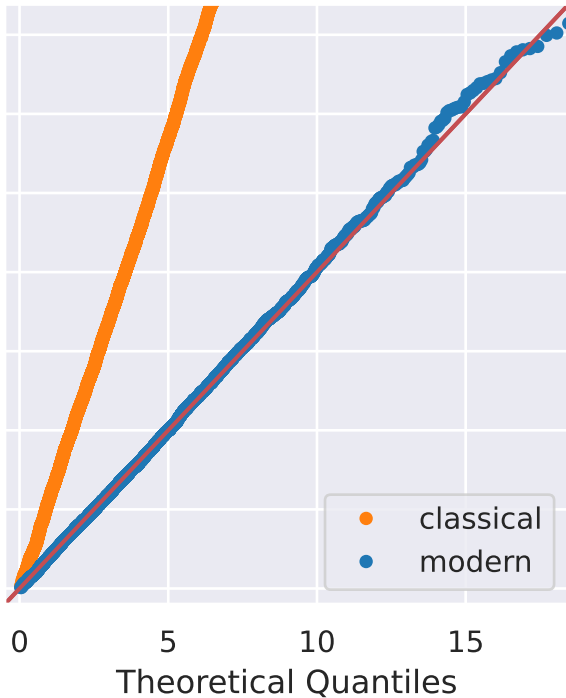

Supplement: supplementary_material [file attachment]

Sample Quantiles

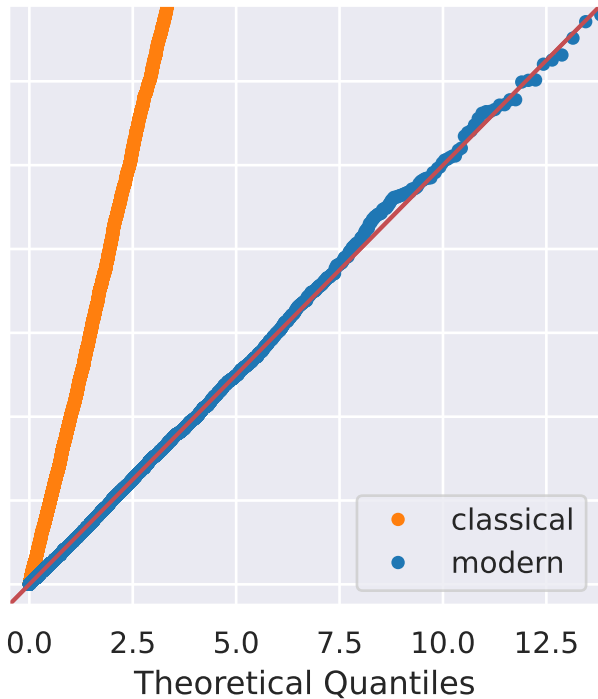

Supplement: supplementary_material [file attachment]

Sample Quantiles

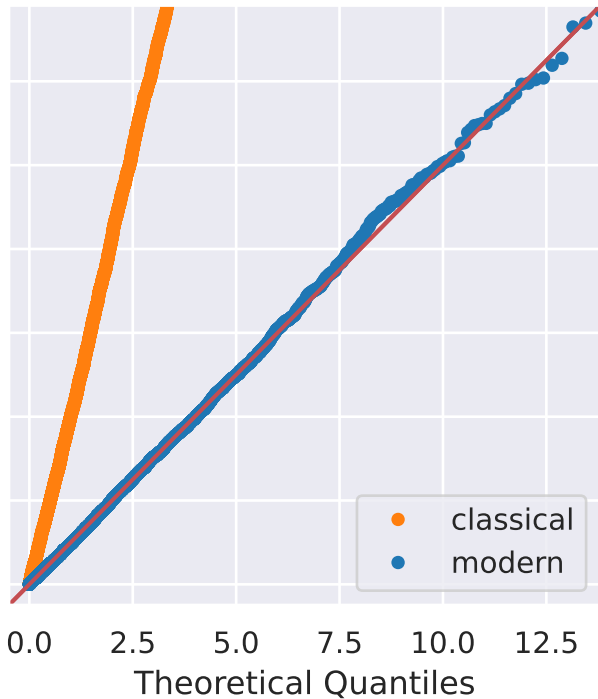

Supplement: supplementary_material [file attachment]

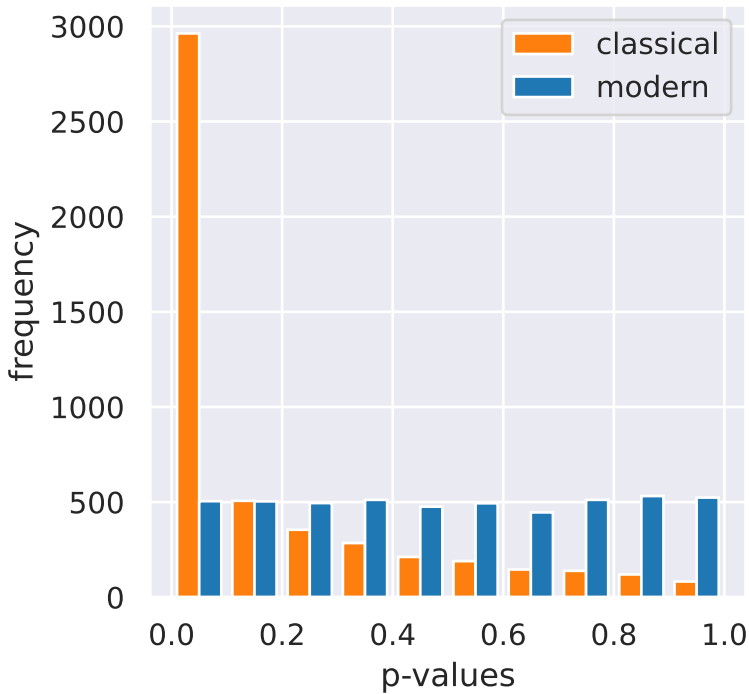

Supplement: supplementary_material [file attachment]

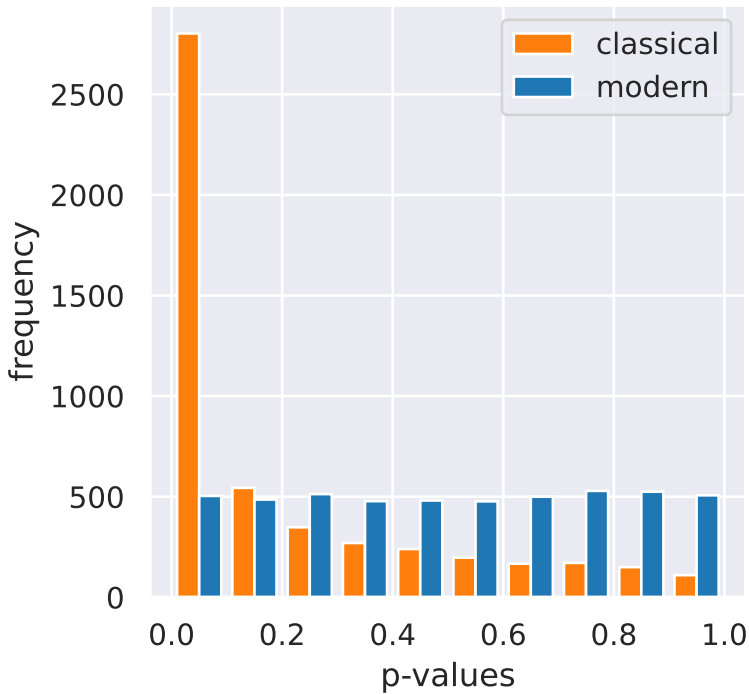

Supplement: supplementary_material [file attachment]

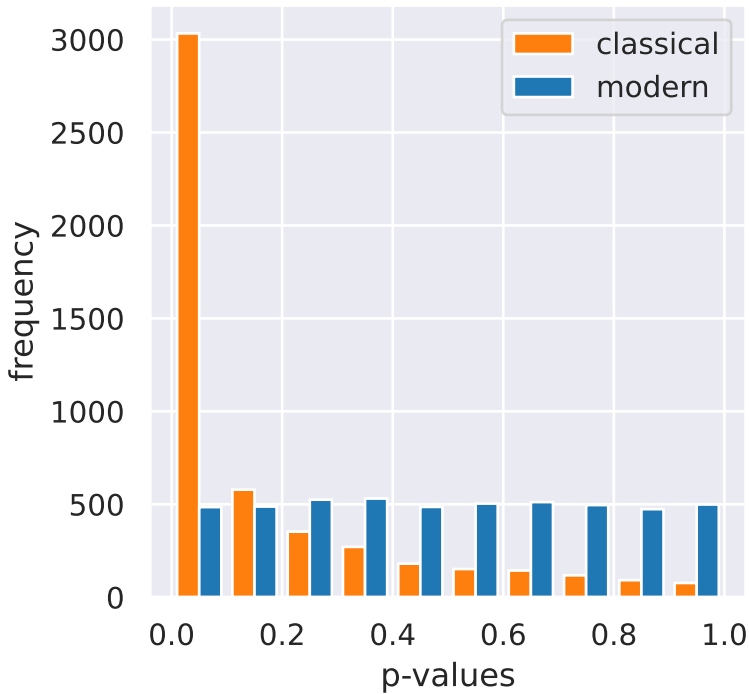

Supplement: supplementary_material [file attachment]

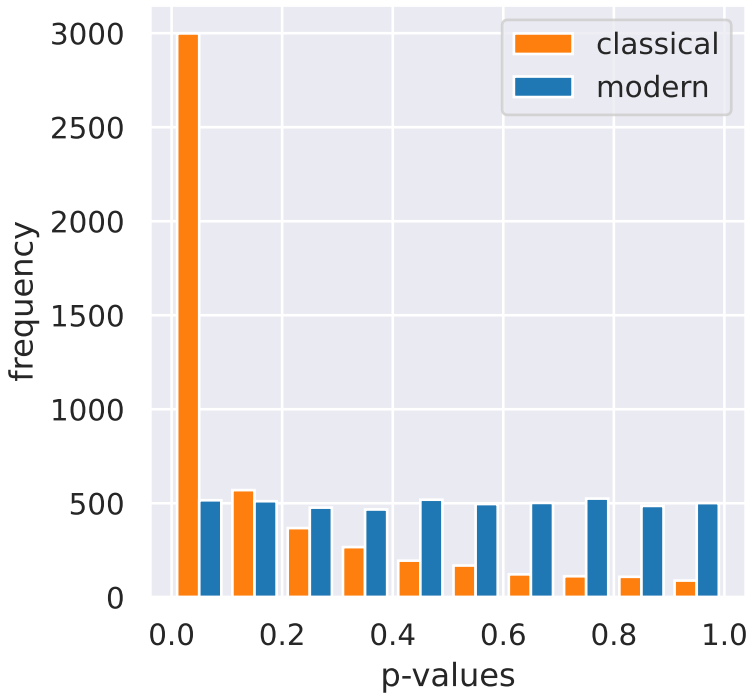

Supplement: supplementary_material [file attachment]

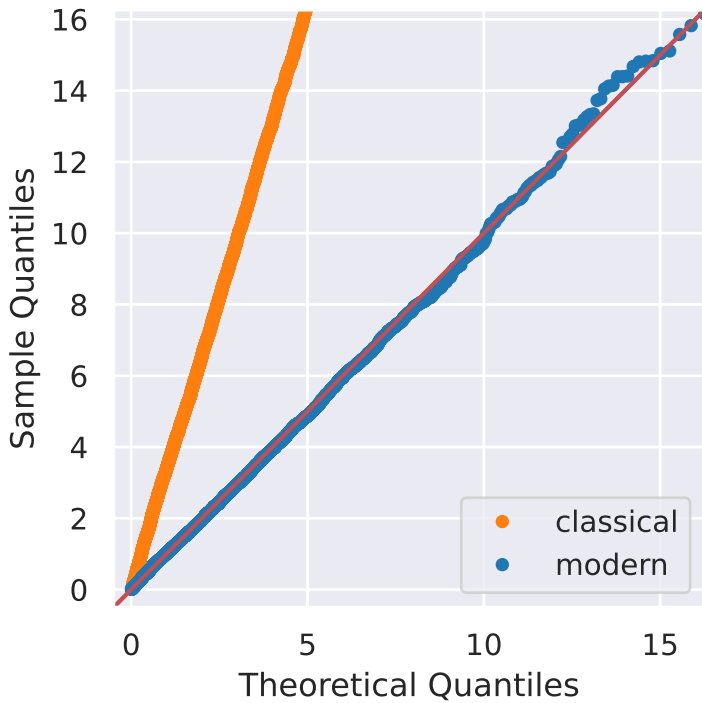

Supplement: supplementary_material [file attachment]

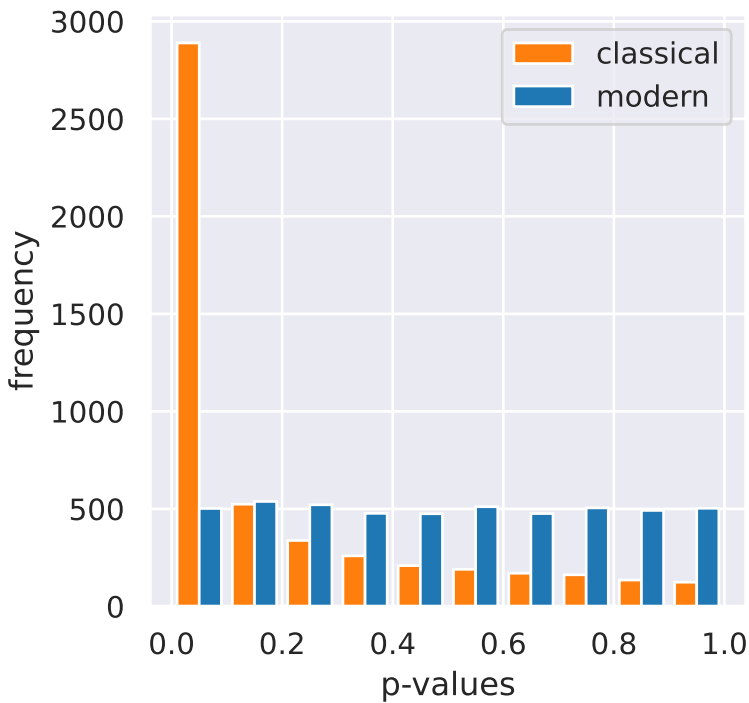

Supplement: supplementary_material [file attachment]

Sample Quantiles

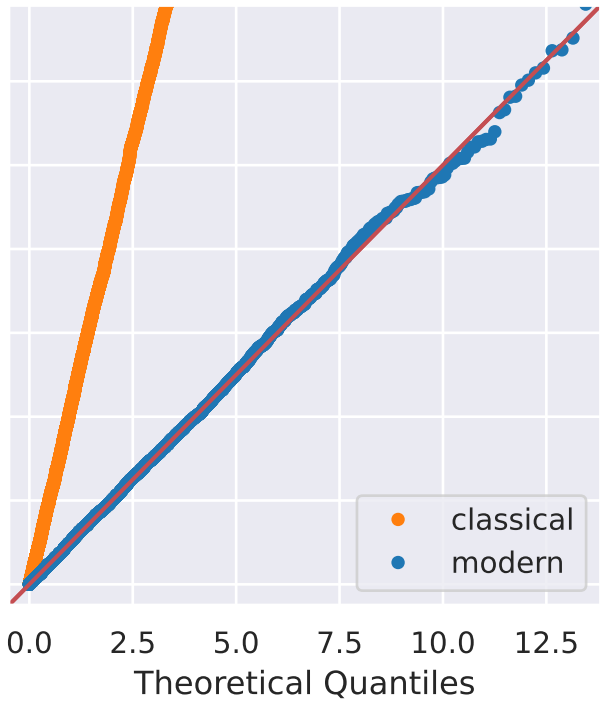

Supplement: supplementary_material [file attachment]

Sample Quantiles

17.5  
15.0  
12.5  
10.0  
7.5  
5.0  
2.5  
0.0

0

5

10

15

Theoretical Quantiles

classical  
modern

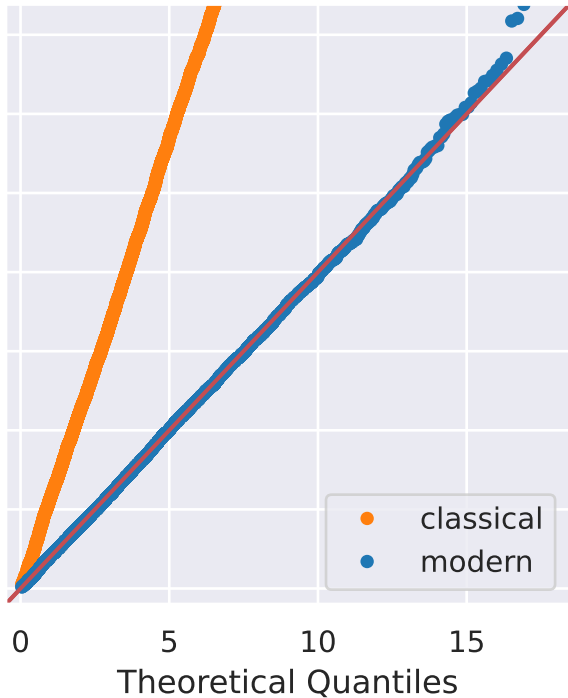

Supplement: supplementary_material [file attachment]

classical; coverage:30.5%

modern; coverage:94.3%

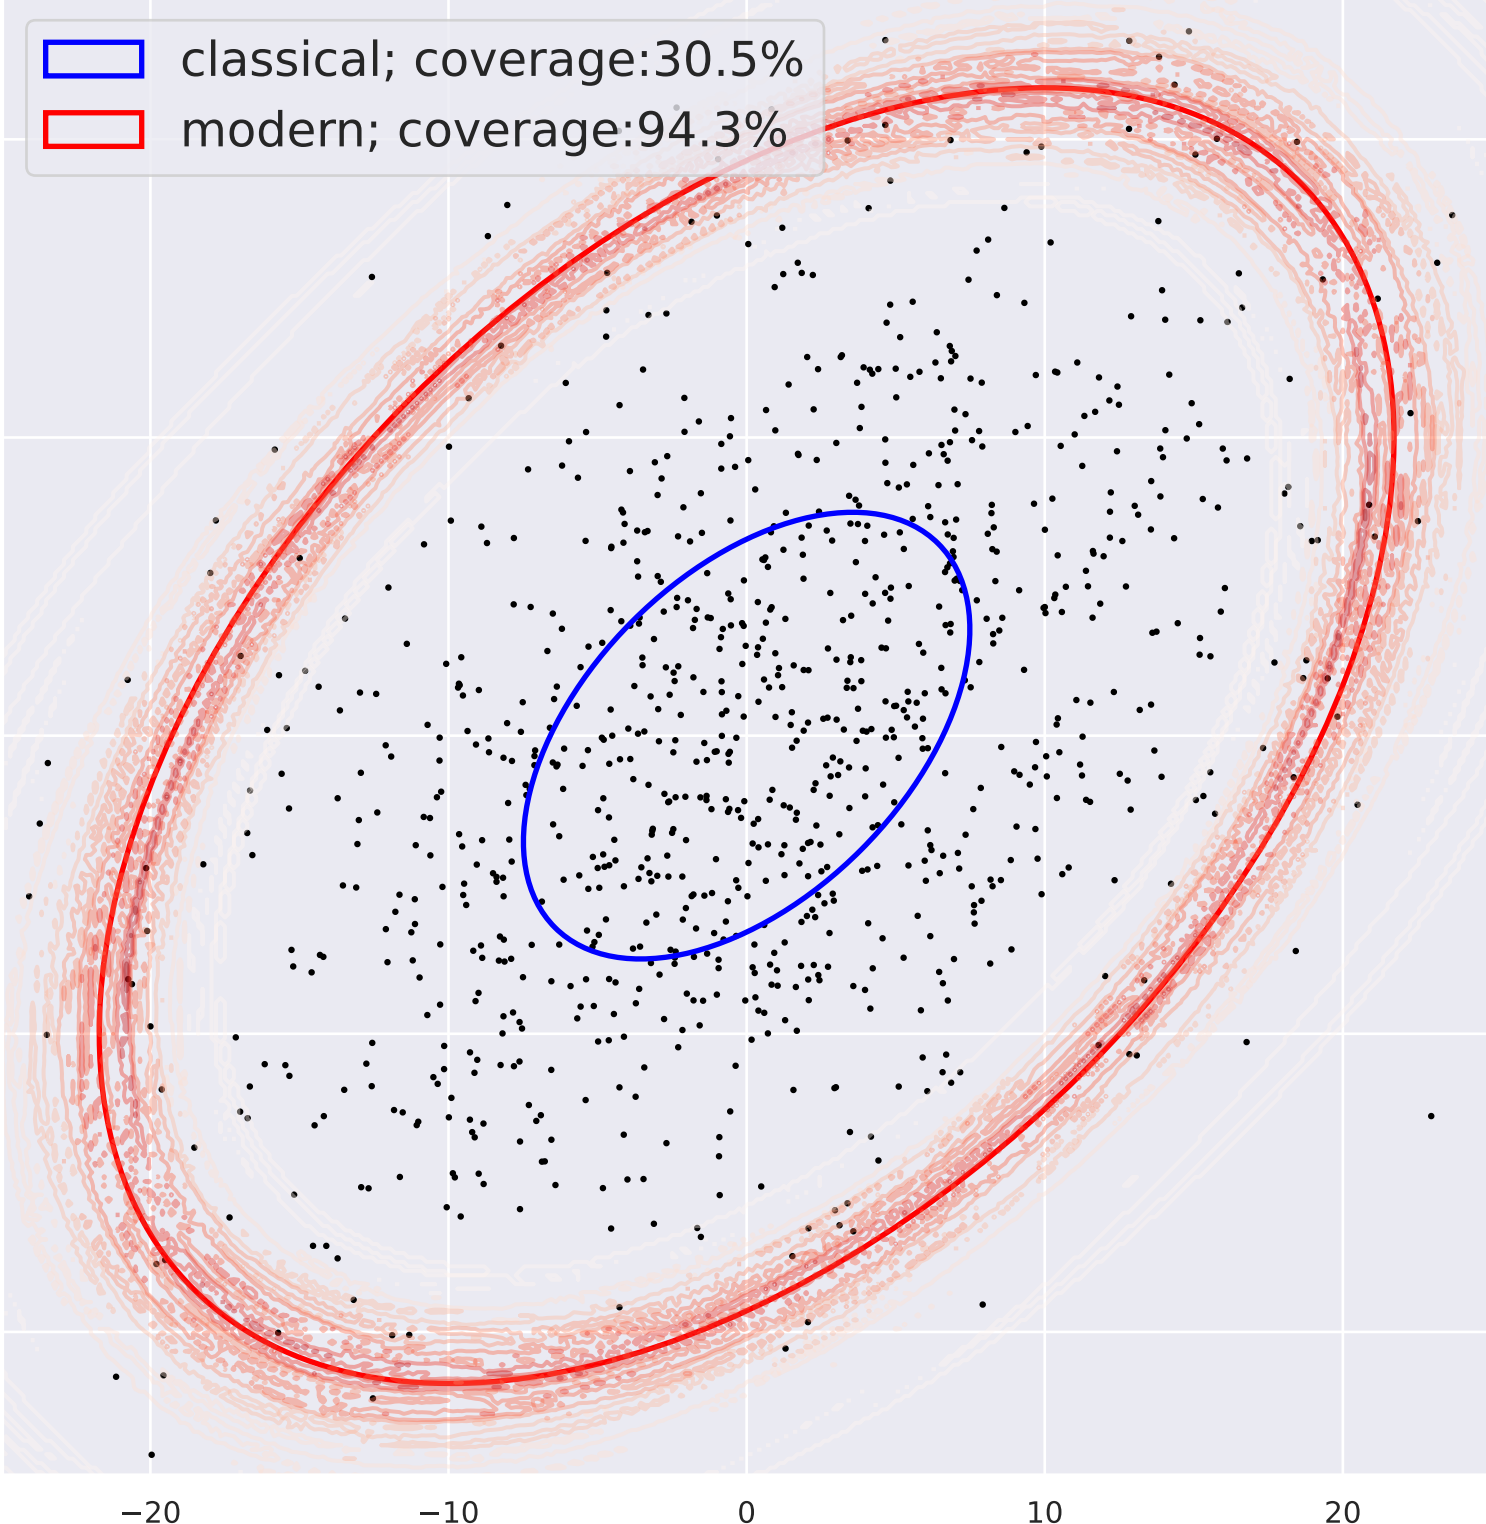

Supplement: supplementary_material [file attachment]

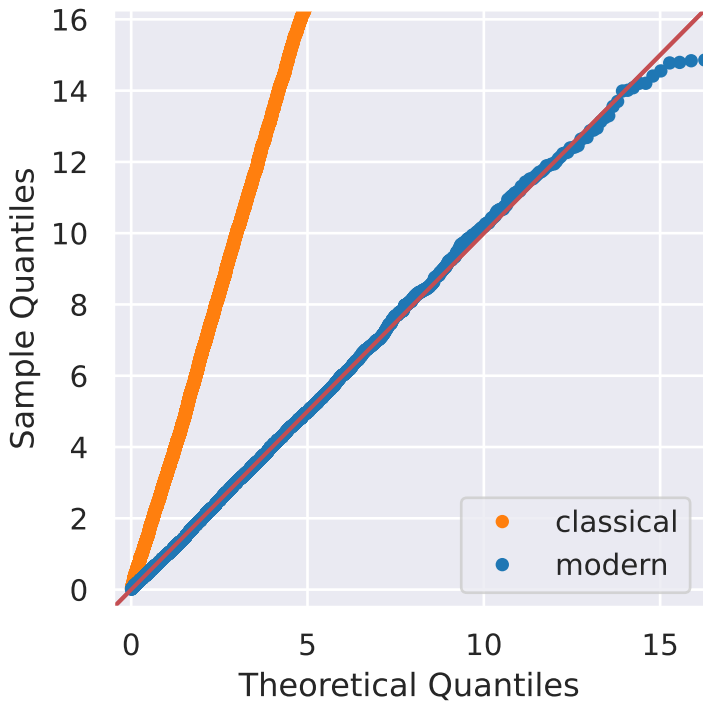

Supplement: supplementary_material [file attachment]

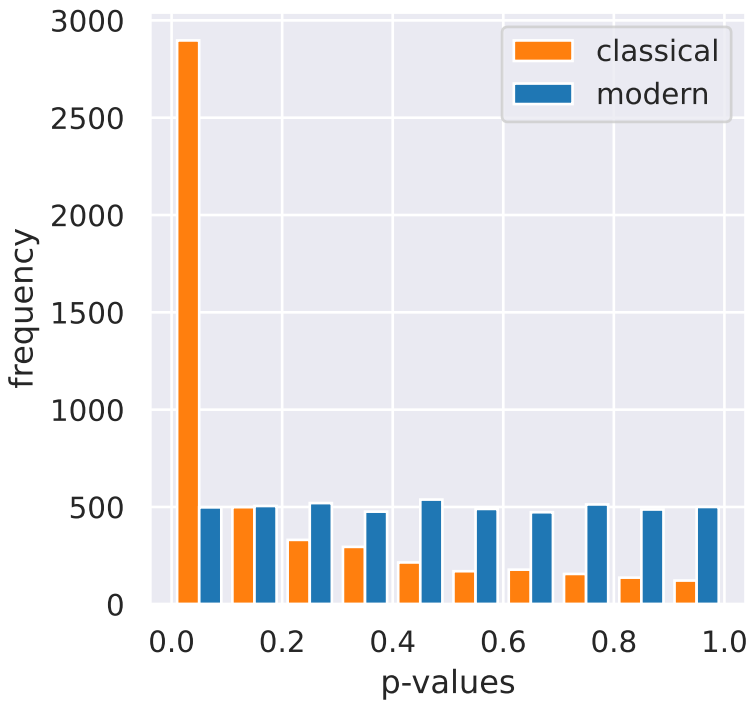

Supplement: supplementary_material [file attachment]

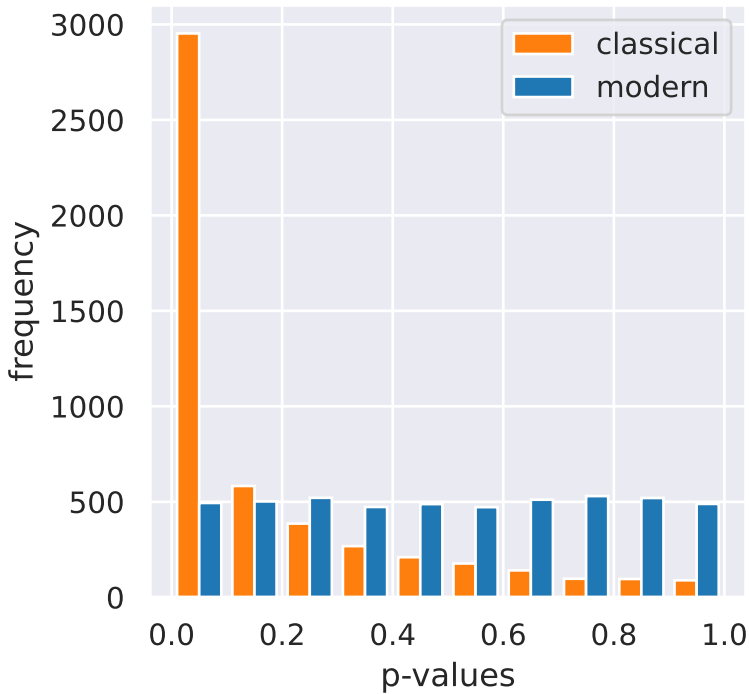

Supplement: supplementary_material [file attachment]

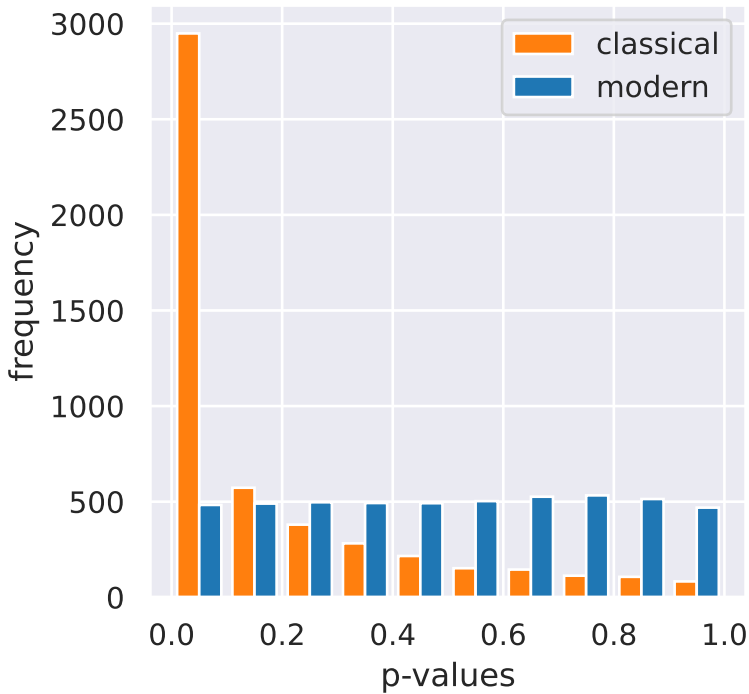

Supplement: supplementary_material [file attachment]

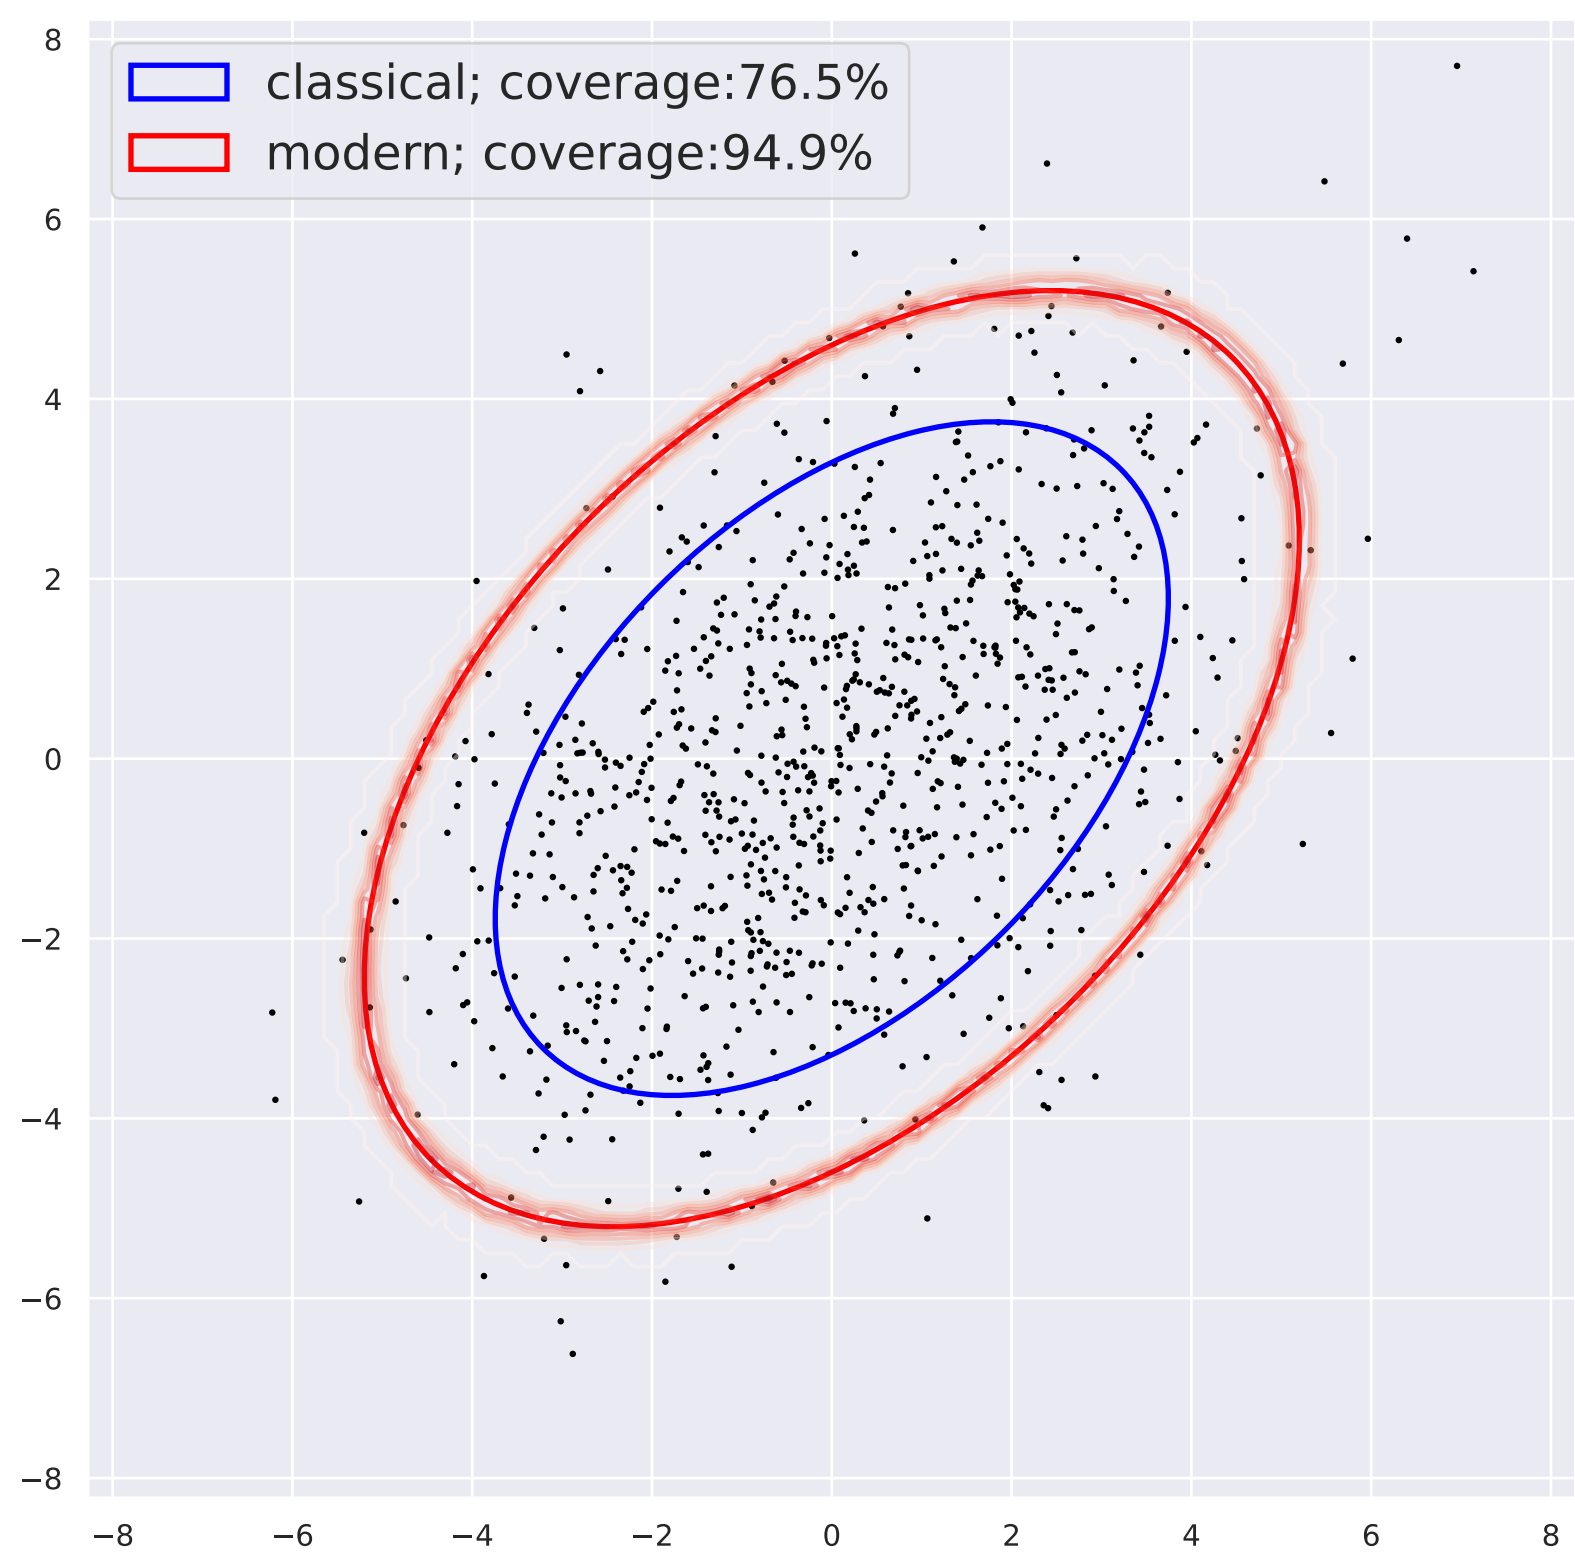

Supplement: supplementary_material [file attachment]
